# Supplementary material for: IsDge10 is a hypercompact TnpB nuclease that confers efficient genome editing in rice
Source: PubMed Central journal article supplement — Plant Commun. 2024 Aug 21;5(11):101068. doi: 10.1016/j.xplc.2024.101068 (PMC11589281; doi:10.1016/j.xplc.2024.101068), 2024-08-21
Supplement: mmc1.pdf [file mmc1.pdf]

**Plant Communications, Volume 5**

**Supplemental information**

**IsDge10 is a hypercompact TnpB nuclease that confers efficient genome editing in rice**

**Rui Zhang, Xu Tang, Yao He, Yangcun Li, Wei Wang, Yawei Wang, Danning Wang, Xuelian Zheng, Yiping Qi, and Yong Zhang**

# **IsDge10 is a hypercompact TnpB nuclease that confers efficient genome editing in rice**

Rui Zhang<sup>1, 2</sup>, Xu Tang<sup>2, 3</sup>, Yao He<sup>2</sup>, Yangcun Li<sup>2</sup>, Wei Wang<sup>1</sup>, Yawei Wang<sup>1</sup>, Danning Wang<sup>1</sup>, Xuelian Zheng<sup>2</sup>, Yiping Qi<sup>4, 5\*</sup>, Yong Zhang<sup>2\*</sup>

<sup>1</sup>Department of Biotechnology, School of Life Sciences and Technology, Center for Informational Biology, University of Electronic Science and Technology of China, Chengdu 610054, China; <sup>2</sup>Integrative Science Center of Germplasm Creation in Western China (Chongqing) Science City, Chongqing Key Laboratory of Tree Germplasm Innovation and Utilization, School of Life Sciences, Southwest University, 400715 Chongqing, China; <sup>3</sup>State Key Lab of Rice Biology, China National Rice Research Institute, Hangzhou 311400, Zhejiang, China; <sup>4</sup>Department of Plant Science and Landscape Architecture, University of Maryland, College Park, Maryland 20742, USA; <sup>5</sup>Institute for Bioscience and Biotechnology Research, University of Maryland, Rockville, Maryland 20850;

**Running title: Hypercompact IsDge10 enables genome editing in rice**

## **\*Corresponding authors:**

Yong Zhang, Integrative Science Center of Germplasm Creation in Western China (Chongqing) Science City, Chongqing Key Laboratory of Tree Germplasm Innovation and Utilization, School of Life Sciences, Southwest University, Chongqing 400715, China; Email: [zhangyong916@swu.edu.cn](mailto:zhangyong916@swu.edu.cn)

Yiping Qi, Department of Plant Science and Landscape Architecture, University of Maryland, College Park, MD 20742, USA; Email: [yiping@umd.edu](mailto:yiping@umd.edu)

## **SUPPLEMENTAL INFORMATION**

### **Supplemental Materials and Methods.**

**Supplementary Figure 1. Detection of genome editing activity with a florescent report assay in rice protoplasts.**

**Supplementary Figure 2. Comparison of different nucleases at rice endogenous sites in rice protoplasts.**

**Supplementary Figure 3. Deletion size profile of IsDge10 at 7 target sites in rice protoplasts.**

**Supplementary Figure 4. Deletion position profile of IsDge10 at 7 target sites in rice protoplasts.**

**Supplementary Figure 5. Sequence alignment results of editing events of IsDge10 at 4 target sites in rice protoplasts.**

**Supplementary Figure 6. Deletion size profile of enlscB at 5 target sites in rice protoplasts.**

**Supplementary Figure 7. Deletion position profile of enlscB at 5 target sites in rice protoplasts.**

**Supplementary Figure 8. Genotype of IsDge10 induced genome editing in rice T0 lines.**

**Supplementary Figure 9. Sanger sequencing results of IsDge10 induced genome editing in rice T0 lines.**

**Supplementary Figure 10. Deletion size profile of IsDge10 at 7 target sites in rice protoplasts using a multiple-editing strategy.**

**Supplementary Figure 11. Deletion position profile of IsDge10 at 7 target sites in rice protoplasts using a multiple-editing strategy.**

**Supplementary Figure 12. Nucleotide sequences encoding the IsDge10, IsAam1, enlscB and SpuFz1 codon-optimized for rice.**

### **Supplementary Tables**

**Supplementary Table 1. Guide RNAs used in this study.**

**Supplementary Table 2. Oligos used in this study.**

## Supplemental Materials and Methods

### Vector construction

To construct the rice *IsDge10* vector, the rice codon-optimized *IsDge10* was synthesized by Genscript (Nanjing, China). and assembled with the *Zea mays* ubiquitin 1 (*ZmUbi1*) promoter and *A. thaliana* heat shock protein (*AtHSP*) terminator using Golden Gate assembly using *Bsal*-HFv2 from New England Biolabs, resulting in the *IsDge10* entry vector (pZR406). Subsequently, the  $\omega$ RNA of *IsDge10* was synthesized through overlap extension polymerase chain reaction (PCR). PCR fragments containing the *OsU6-2* promoter, *IsDge10*  $\omega$ RNA and *lacZ*-poly T, were amplified and then inserted into the *Bsal*-linearized pTSWB vector using Gibson assembly with the NEBuilder HiFi DNA Assembly Cloning Kit from New England Biolabs, yielding the  $\omega$ RNA entry vectors p*OsU6-2-IsDge10*  $\omega$ RNA (pZR389). To generate the final *IsDge10* backbone, the *IsDge10* entry vector,  $\omega$ RNA entry vector and pMOD\_C0000a were assembled into the T-DNA backbone pTRANS\_210d (Addgene Plasmid #91109) to generate rice *IsDge10* backbone pGEL1011 using Golden Gate assembly. The backbones of *IsAam1*, *IsDra2*, *IsYmu1*, *enlscB* and *SpuFz1* were generated by same way. In order to construct *IsDge10* multiplex editing vector, PCR fragments containing the *ZmUbi1* promoter-Hammerhead ribozyme, *IsDge10*  $\omega$ RNA-*lacZ* and hepatitis delta virus (HDV) ribozyme-pinII terminator were amplified and inserted into the *Bsal*-linearized pTSWB vector, yielding the  $\omega$ RNA entry vector p*OsUbi1- IsDge10*  $\omega$ RNA (pZR527). To generate the final *IsDge10* multiplex editing backbone, the *IsDge10* entry vector, the  $\omega$ RNA entry (p*OsUbi1-IsDge10*  $\omega$ RNA) and pMOD\_C0000a were assembled into the T-DNA backbone pTRANS\_210d to generate rice *IsDge10* multiplex editing backbone pGEL1012 using Golden Gate assembly. Nucleotide sequences of *IsDge10*, *IsAam1*, *enlscB* and *SpuFz1* codon-optimized for rice were shown in **Supplementary Figure 12**.

### Rice protoplast transformation

The Japonica cultivar Nipponbare rice was used in this study. Rice protoplast isolation and PEG-mediated transformation were performed as previously described (Tang et al., 2019). Briefly, the rice plants were grown in the dark at 28 °C. Then healthy rice seedlings were cut in about 1.0 mm strips, and immediately transferred into the 10ml enzyme solution, followed by vacuum-infiltration for 30 min and incubation at 80 rpm for 6 hours at 25°C in the dark. Next, a 40  $\mu$ m cell strainer was used to filter the digested products on a 90mm petri dish and further transferred into a sterile 50ml

Falcon tube. The protoplasts were collected by centrifugation at 100 g for 5 min and suspended in 10 ml W5 solution for washing. Then, the W5 solution was removed by centrifugation at 100 g for 2 min and the protoplasts were suspended at a concentration of  $2 \times 10^6$  ml<sup>-1</sup> in MMG buffer. For transformation, 30 µl plasmids (containing 30 µg DNA) were transformed into 200 µl protoplasts. The mixture was gently mixed with 230 µl PEG transformation buffer for 20 min. The transfection reaction was stopped by adding 1 ml W5 buffer. The protoplasts were collected by centrifugation at 250 g for 5 min, gently suspended in 600 µl W5 buffer, and then transferred to a 12-well culture plate. The plate was placed in the dark at 32°C for 48 hours before monitoring under a microscope or extracting DNA.

For fluorescence reporter system test in rice protoplasts, 30 µl plasmids (containing 15 µg DNA of reporter and 15 µg DNA of editing vector) were transformed into 200 µl protoplasts. After 48 hours of dark incubation, we used an Olympus IX73 Inverted Microscope to photograph the transformed rice cells. The microscope was configured with an excitation light intensity set to 25% and an exposure time of 200 ms for image capture. For each biological replicate, we randomly selected a field of view for image capture and separately recorded the raw grayscale values of the mCherry signal and the ZsGreen signal provided by the system. We then calculated the decrease in mCherry by dividing the mCherry signal by the ZsGreen signal. Each experiment was performed with three biological replicates.

### **Rice stable transformation**

As with our previous study (Zhou et al., 2017), the cultivar Japonica Nipponbare was used for stable *Agrobacterium*-mediated transformation of rice. Briefly, the sterilized rice seeds were placed on solid N6-D medium. Precultured rice calli were transformed by inoculating *Agrobacterium* EHA105 carrying the recombinant expression vector. The inoculated calli were co-cultured with *Agrobacterium* for 3 d on 2N6-AS solid medium. Then the calli were washed and transferred to N6D-S solid medium containing 400 mg/l timentin and 50 mg/l hygromycin for 2 weeks. Resistant calli were then transferred to RE-III medium for obtain regenerated plants.

### **Mutagenesis analysis**

The Next-Generation Sequencing (NGS) of PCR amplicons was used for evaluating

editing efficiency in rice protoplasts. Genomic DNA was extracted from the protoplasts using the CTAB method (Stewart and Via, 1993). The amplicons of the editing regions were amplified by 2 x *Rapid Taq* Master Mix (Vazyme, China). Amplicons were sent to Novogene (China, Tianjin) for deep-sequencing by the Novaseq6000 platform which produced 150 bp paired-end reads. The editing frequency was analyzed by the CRISPRMatch and CrisprStitch (Han et al., 2024; You et al., 2018). For stable rice T0 lines, DNA was extracted from the T0 generation using the CTAB method (Stewart and Via, 1993). Then the target sites were amplified by 2 x *Rapid Taq* Master Mix (Vazyme, China) and the products were sent to Sangon Biotech (Shanghai, China) for direct PCR product sanger sequencing. Sanger sequencing data were analyzed by Snapgene software ([www.snapgene.com](http://www.snapgene.com)).

### Statistical analysis

For all bar graphs, the mean and standard deviation (SD) were calculated and plotted using GraphPad Prism 8.0 software, with SD provided only for samples with  $n > 2$ . The data are presented as mean  $\pm$  SD. Statistical significance was analyzed using an unpaired two-tailed t-test with equal variance in Microsoft Excel version 2212. Asterisks indicate significant differences according to Student's t-test ( $*p < 0.05$ ,  $**p < 0.01$ ,  $***p < 0.001$ ,  $****p < 0.0001$ ). The figures were further processed using Adobe Photoshop and Adobe Illustrator software.

### Reference

- Han, Y., Liu, G., Wu, Y., Bao, Y., Zhang, Y., and Zhang, T. (2024). CrisprStitch: Fast evaluation of the efficiency of CRISPR editing systems. *Plant Commun* **5**:100783. 10.1016/j.xplc.2023.100783.
- Stewart, C.N., Jr., and Via, L.E. (1993). A rapid CTAB DNA isolation technique useful for RAPD fingerprinting and other PCR applications. *Biotechniques* **14**:748-750.
- Tang, X., Ren, Q., Yang, L., Bao, Y., Zhong, Z., He, Y., Liu, S., Qi, C., Liu, B., Wang, Y., et al. (2019). Single transcript unit CRISPR 2.0 systems for robust Cas9 and Cas12a mediated plant genome editing. *Plant Biotechnol J* **17**:1431-1445. 10.1111/pbi.13068.
- You, Q., Zhong, Z., Ren, Q., Hassan, F., Zhang, Y., and Zhang, T. (2018). CRISPRMatch: an automatic calculation and visualization tool for high-throughput CRISPR genome-editing data analysis. *Int J Biol Sci* **14**:858-862. 10.7150/ijbs.24581.
- Zhou, J., Deng, K., Cheng, Y., Zhong, Z., Tian, L., Tang, X., Tang, A., Zheng, X., Zhang, T., Qi, Y., et al. (2017). CRISPR-Cas9 based genome editing reveals new insights into MicroRNA function and regulation in rice. *Front Plant Sci* **8**:1598. 10.3389/fpls.2017.01598.

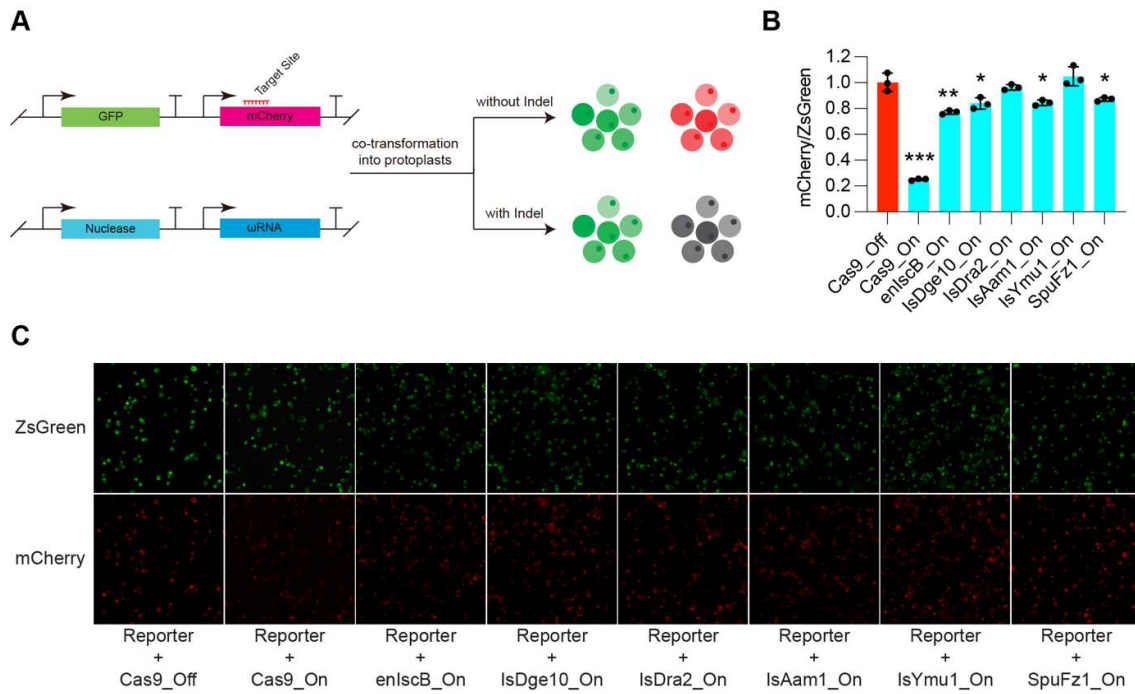

**Supplementary Figure 1. Detection of genome editing activity with a fluorescent report assay in rice protoplasts.** (A) A diagram of a dual-fluorescence reporter system. (B) The decrease of mCherry fluorescence induced by targeted mutagenesis of different editing systems. (C) Decrease of mCherry fluorescence expression after co-transfection. Each dot represents a biological replicate. Data are presented as mean values +/- SD. Data were analyzed using two-tailed unpaired t-Test.

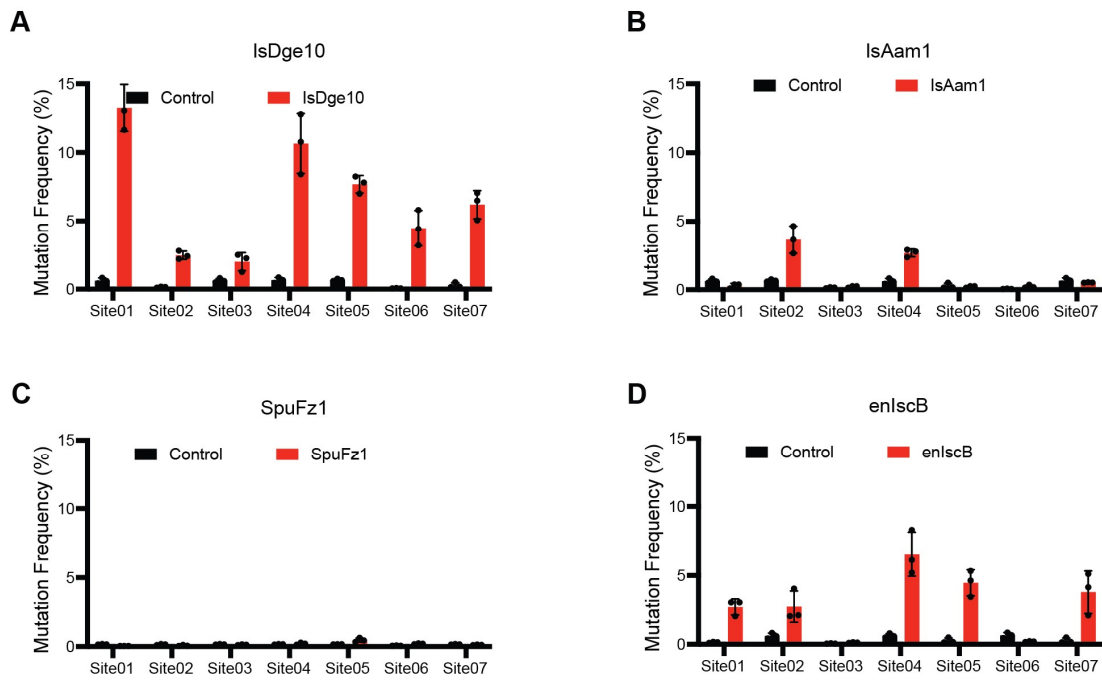

**Supplementary Figure 2. Comparison of different nucleases at rice endogenous sites in rice protoplasts.** (A) Editing efficiency of the IsDge10 system at seven endogenous sites in rice. (B) Editing efficiency of the IsAam1 system at seven endogenous sites in rice. (C) Editing efficiency of the SpuFz system at seven endogenous sites in rice. (D) Editing efficiency of the enlscB system at seven endogenous sites in rice. Each dot represents a biological replicate. Data are presented as mean values  $\pm$  SD. Data were analyzed using two-tailed unpaired t-Test.



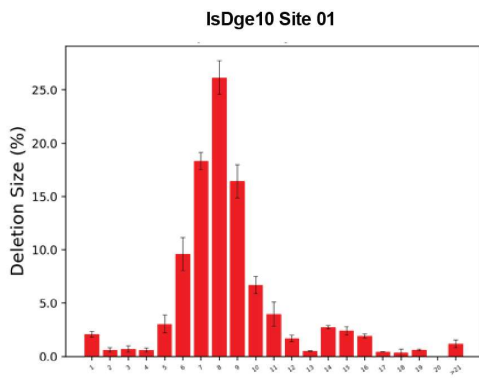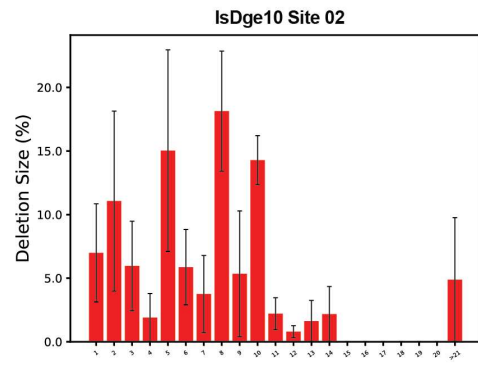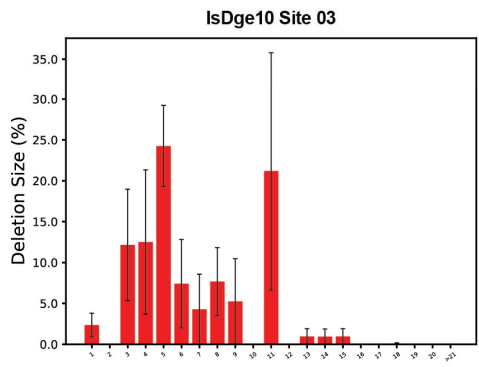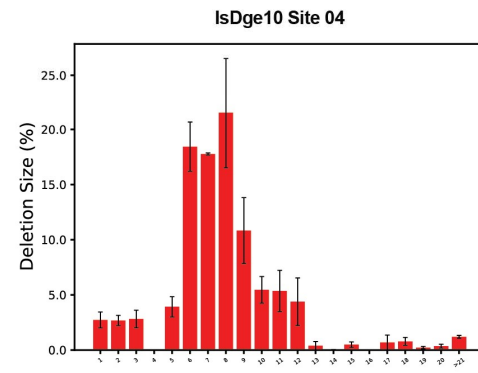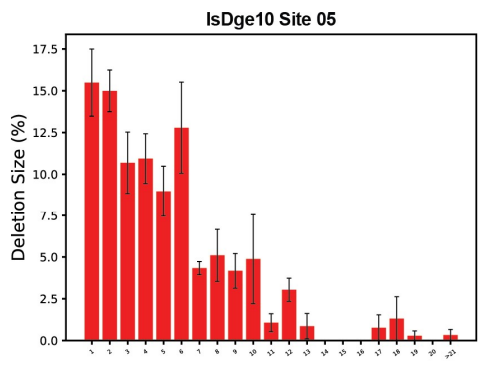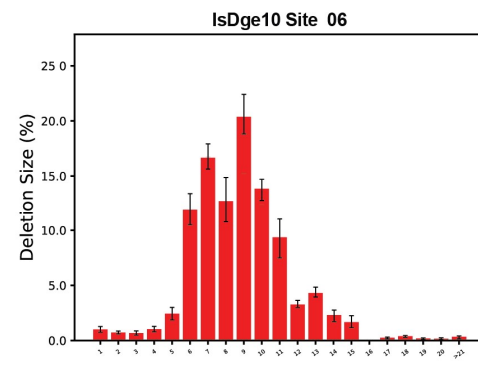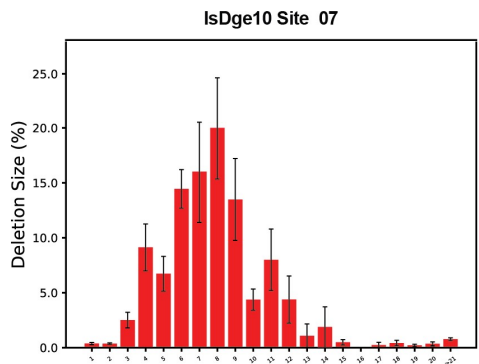

**Supplementary Figure 3. Deletion size profile of IsDge10 at 7 target sites in rice protoplasts.** Each assay contains three independent experiments (n=3). Data are presented as mean values +/- SD.

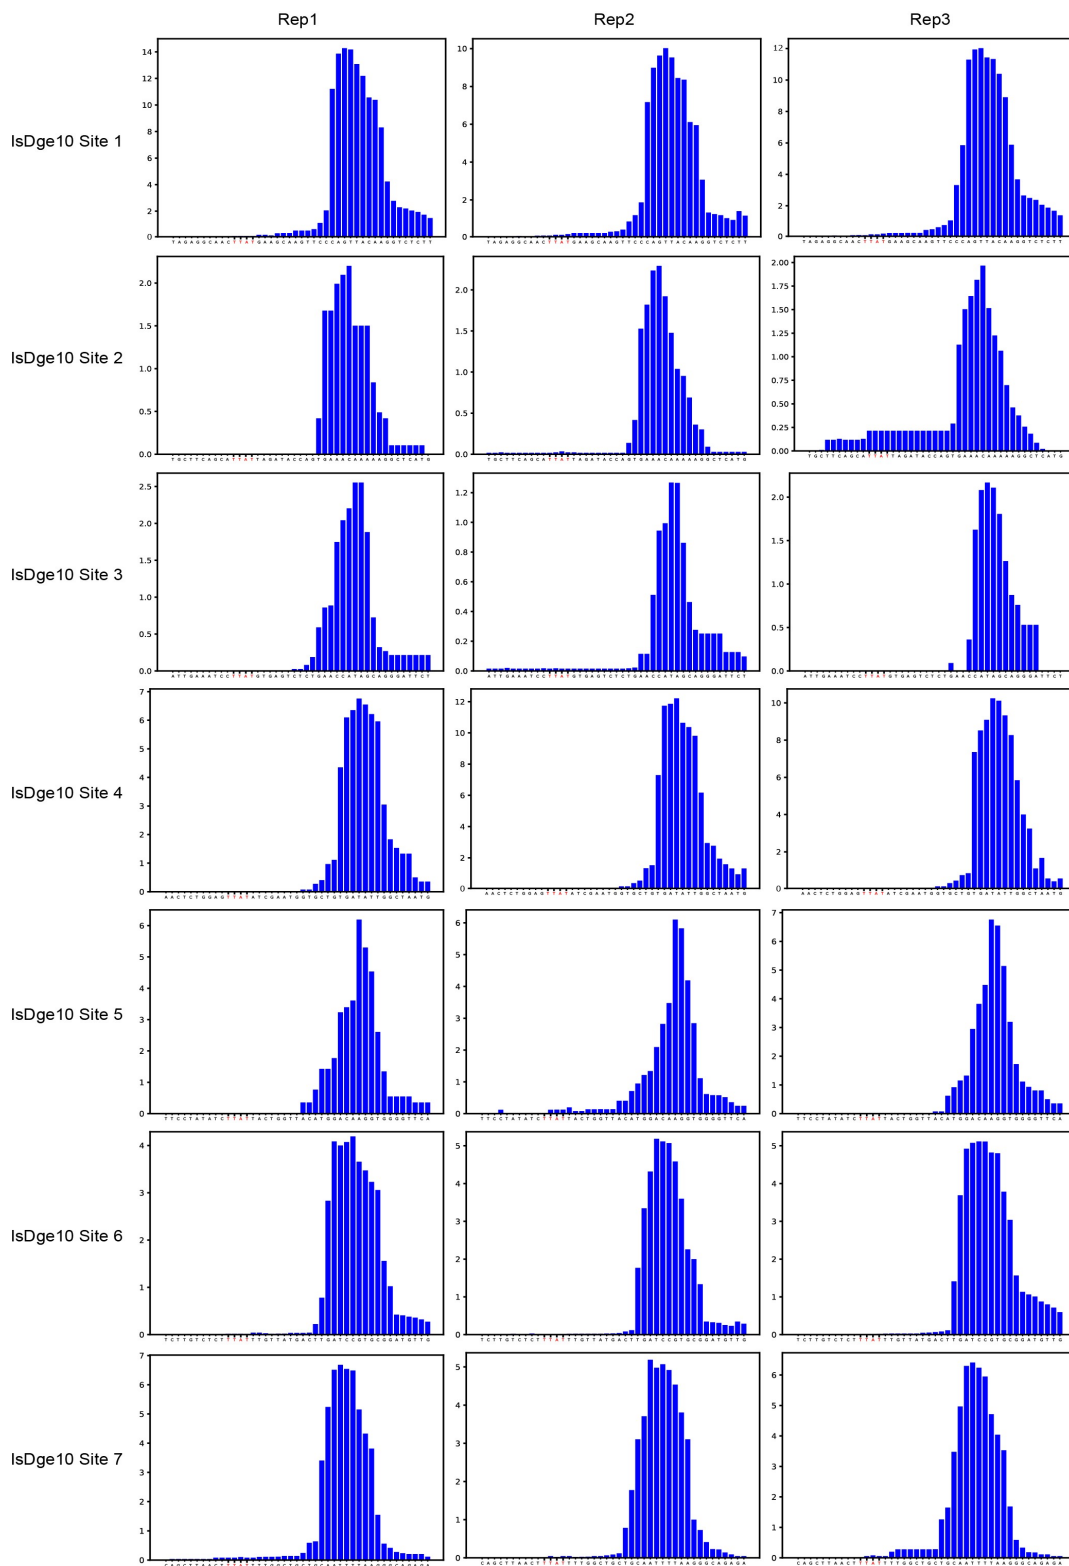

**Supplementary Figure 4. Deletion position profile of IsDge10 at 7 target sites in rice protoplasts.** Editing at each site was biologically replicated three times, designated as Rep1, Rep2, and Rep3, respectively. Sequence in red indicated the TAM of IsDge10.

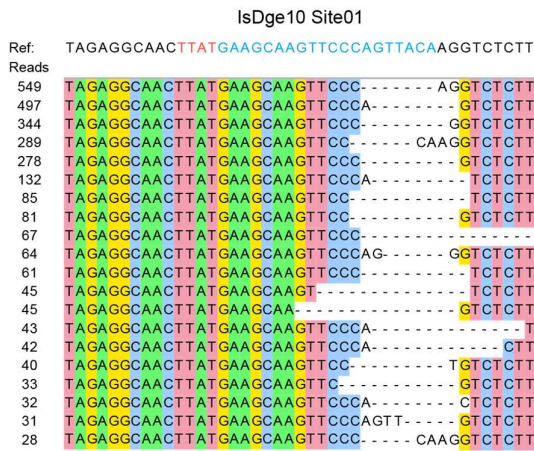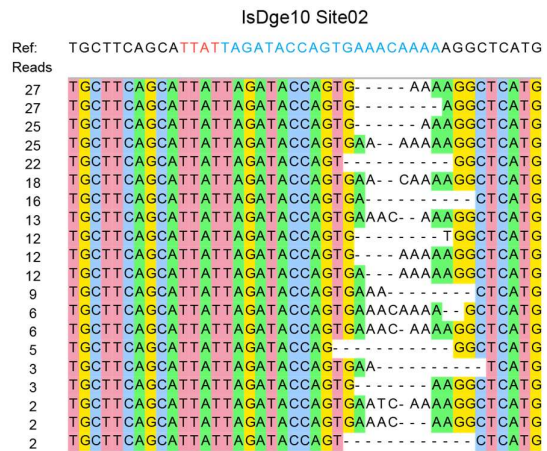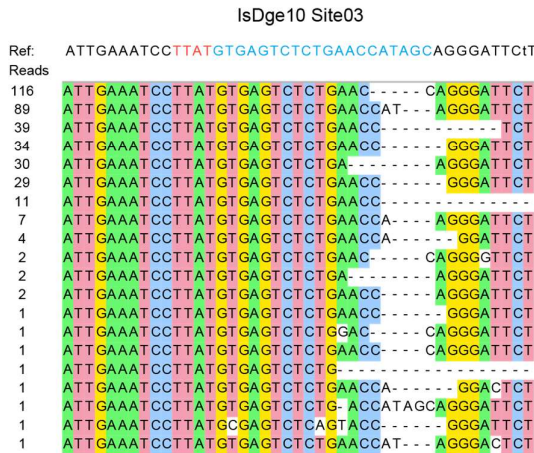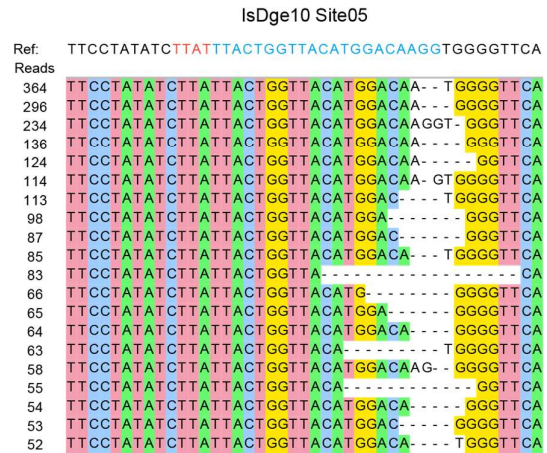

**Supplementary Figure 5. Sequence alignment results of editing events of IsDge10 at 4 target sites in rice protoplasts.** Sequences in blue indicate the guide RNA, and sequences in red indicate the TAM of IsDge10.

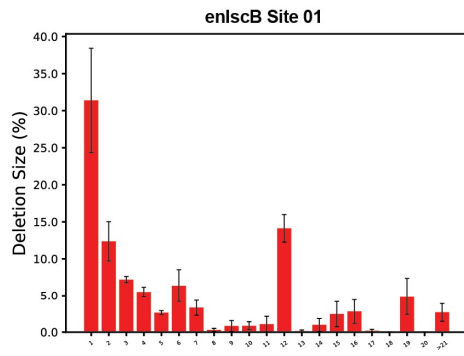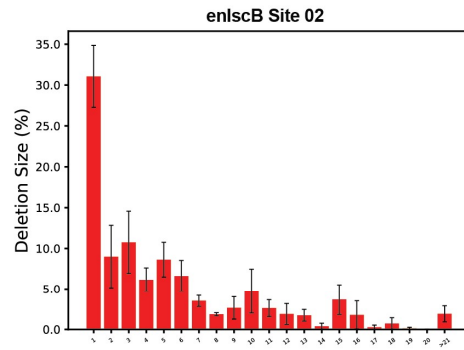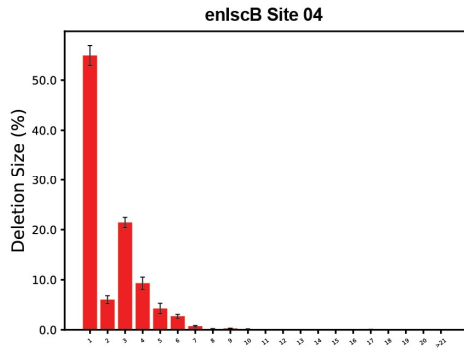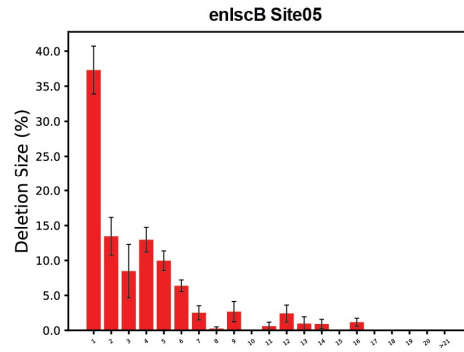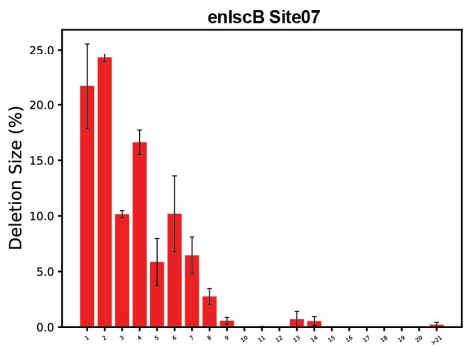

**Supplementary Figure 6. Deletion size profile of enlscB at 5 target sites in rice protoplasts.** Each assay contains three independent experiments (n=3). Data are presented as mean values +/- SD.

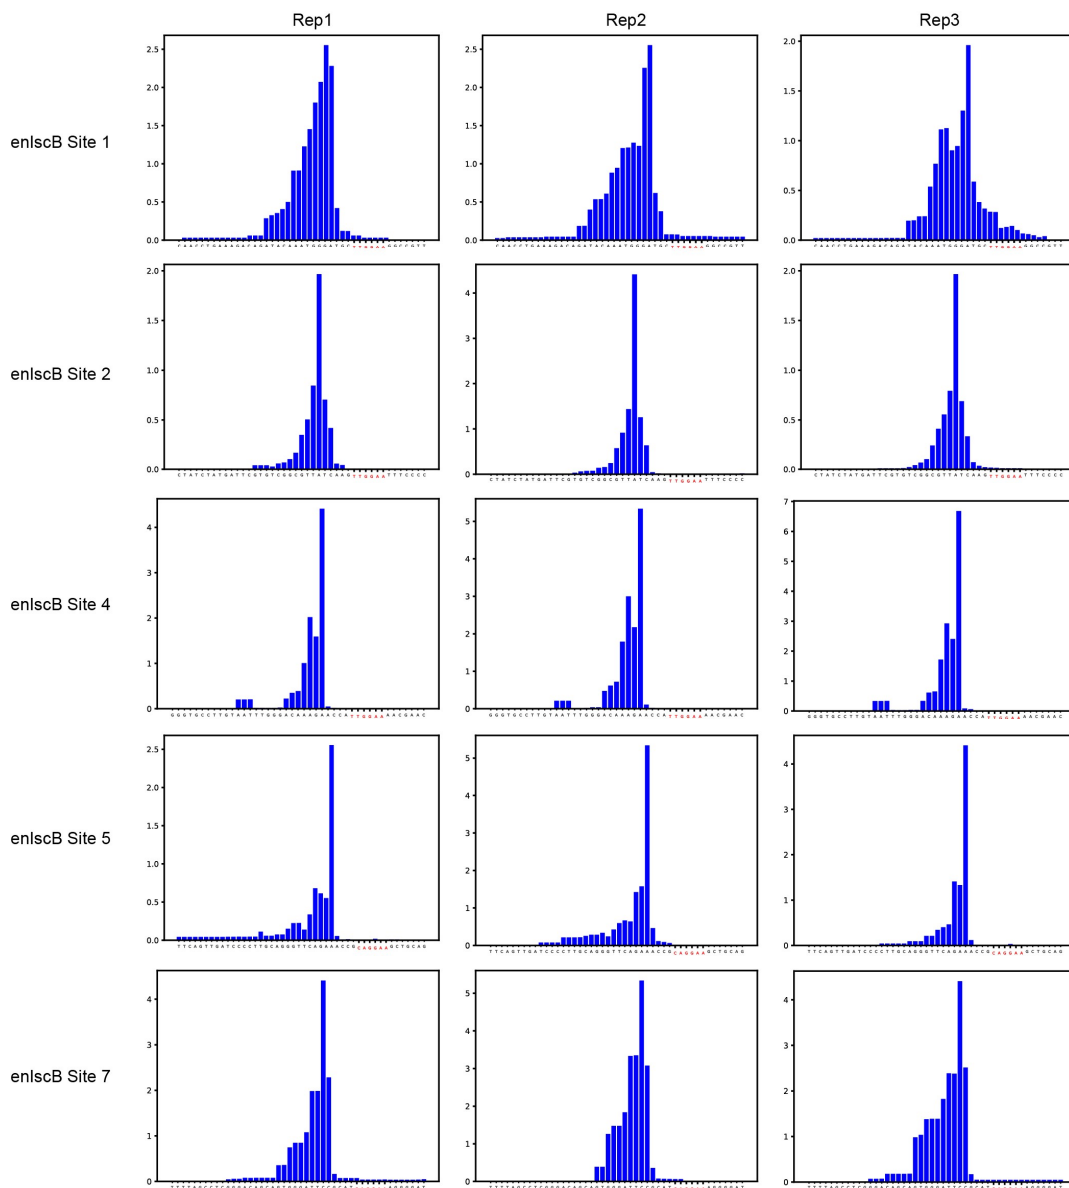

**Supplementary Figure 7. Deletion position profile of enlscB at 5 target sites in rice protoplasts.** Editing at each site was biologically replicated three times, designated as Rep1, Rep2, and Rep3, respectively. Sequence in red indicated the TAM of enlscB.

|               |                                    |               |                                    |
|---------------|------------------------------------|---------------|------------------------------------|
| <b>Site 1</b> |                                    | <b>Site 5</b> |                                    |
| Ref:          | GCAACTTATGAAGCAAGTCCCAGTTACAAGGTC  | Ref:          | ATATCTTATTACTGGTTACATGGACAAGGTGGGG |
| #pZR489-3     |                                    | #pZR493-1     |                                    |
| Allele 1:     | GCAACTTATGAAGCAAGTCCCAGTTACAAGGTC  | Allele 1:     | ATATCTTATTACTGGTTACATGGACAAGGTGGGG |
| Allele 2:     | GCAACTTATGAAG-----TCCCAGTTACAAGGTC | Allele 2:     | ATATCTTATTACTGGTTACAT-----GGG      |
|               | -5bp                               |               | -10bp                              |
| #pZR489-6     |                                    | #pZR493-5     |                                    |
| Allele 1:     | GCAACTTATGAAGCAAGTCCCAGTTACAAGGTC  | Allele 1:     | ATATCTTATTACTGGTTACATGGACAAGGTGGGG |
| Allele 2:     | GCAACTTATGAAGCAAGTCCC-----TC       | Allele 2:     | ATATCTTATTACTGGTTACATGGACAA---GGG  |
|               | -10bp                              |               | -4bp                               |
| #pZR489-10    |                                    | #pZR493-20    |                                    |
| Allele 1:     | GCAACTTATGAAGCAAGTCCCAGTTACAAGGTC  | Allele 1:     | ATATCTTATTACTGGTTACATGGACAAGGTGGGG |
| Allele 2:     | GCAACTTATGAAGCAAGTCCC-----GGTC     | Allele 2:     | ATATCTTATTACTGGTTACATGGGA-----GGGG |
|               | -8bp                               |               | -6bp                               |
| #pZR489-14    |                                    | #pZR493-16    |                                    |
| Allele 1:     | GCAACTTATGAAGCAAGTCCCAGTTACAAGGTC  | Allele 1:     | ATATCTTATTACTGGTTACATGGACAAGGTGGGG |
| Allele 2:     | GCAACTTATGAAGCAAGTCCCA-----GTC     | Allele 2:     | ATATCTTATTACTGGTTACA-----TGGGG     |
|               | -8bp                               |               | -9bp                               |
| #pZR489-17    |                                    | #pZR493-22    |                                    |
| Allele 1:     | GCAACTTATGAAGCAAGTCCCAGTTACAAGGTC  | Allele 1:     | ATATCTTATTACTGGTTACATGGACAAGGTGGGG |
| Allele 2:     | GCAACTTATGAAGCAAG-----TTACAAGGTC   | Allele 2:     | ATATCTTATTACTGGTTACATGGGA-----GG   |
|               | -7bp                               |               | -8bp                               |
| #pZR489-21    |                                    |               |                                    |
| Allele 1:     | GCAACTTATGAAGCAAGTCCCAGTTACAAGGTC  |               |                                    |
| Allele 2:     | GCAACTTATGAAGCAAGTCCCAGT-----C     |               |                                    |
|               | -8bp                               |               |                                    |
| <b>Site 2</b> |                                    | <b>Site 6</b> |                                    |
| Ref:          | CAGCATTATTAGATACCAGTGAACAAAAAGGCT  | Ref:          | TCTCTTATTGTTGTTGACTTGATCCGTGCGGAT  |
| #pZR490-13    |                                    | #pZR494-9     |                                    |
| Allele 1:     | CAGCATTATTAGATACCAGTGAACAAAAAGGCT  | Allele 1:     | TCTCTTATTGTTGTTGACTTGATCCGTGCGGAT  |
| Allele 2:     | CAGCATTATTAGATACCAGT-----GCT       | Allele 2:     | TCTCTTATTGTTGTTGACT-----GTGCGGAT   |
|               | -11bp                              |               | -6bp                               |
| #pZR491-17    |                                    | #pZR494-13    |                                    |
| Allele 1:     | AATCCTTATGTGAGTCTCTGAACCATAGCAGGGA | Allele 1:     | TCTCTTATTGTTGTTGACTTGATCCGTGCGGAT  |
| Allele 2:     | AATCCTTATGTGAGTCTCTG-----AGGGA     | Allele 2:     | TCTCTTATTGTTGTTGACT-----GCGGAT     |
|               | -9bp                               |               | -8bp                               |
| #pZR491-8     |                                    |               |                                    |
| Allele 1:     | AATCCTTATGTGAGTCTCTGAACCATAGCAGGGA |               |                                    |
| Allele 2:     | AATCCTTATGTGAGTCTCTG-----AGGGA     |               |                                    |
|               | -5bp                               |               |                                    |
| #pZR492-4     |                                    | <b>Site 7</b> |                                    |
| Ref:          | TGGAGTTATATCGAATGGTGTGTGATATGGCT   | Ref:          | TAACTTATTTGGCTGCTGCAATTTTAAAGGGCA  |
| #pZR492-11    |                                    | #pZR495-2     |                                    |
| Allele 1:     | TGGAGTTATATCGAATGGTGTGTGATATGGCT   | Allele 1:     | TAACTTATTTGGCTGCTGCAATTTTAAAGGGCA  |
| Allele 2:     | TGGAGTTATATCGAATGGT-----GGCT       | Allele 2:     | TAACTTATTTGGCTGCTG-----GGGCA       |
|               | -11bp                              |               | -9bp                               |
| #pZR492-15    |                                    | #pZR495-12    |                                    |
| Allele 1:     | TGGAGTTATATCGAATGGTGTGTGATATGGCT   | Allele 1:     | TAACTTATTTGGCTGCTGCAATTTTAAAGGGCA  |
| Allele 2:     | TGGAGTTATATCGAATGGTGC-----TGGCT    | Allele 2:     | TAACTTATTTGGCTGC-----TTAAGGGCA     |
|               | -8bp                               |               | -7bp                               |
| #pZR492-20    |                                    | #pZR495-14    |                                    |
| Allele 1:     | TGGAGTTATATCGAATGGTGTGTGATATGGCT   | Allele 1:     | TAACTTATTTGGCTGCTGCAATTTTAAAGGGCA  |
| Allele 2:     | TGGAGTTATATCGAATGGTGTG-----TGGCT   | Allele 2:     | TAACTTATTTGGCTGCTGCA-----GGGCA     |
|               | -9bp                               |               | -7bp                               |

**Supplementary Figure 8. Genotype of *IsDge10* induced genome editing in rice T0 lines.** Sequences in blue indicate the guide RNA, and sequences in red indicate the TAM.



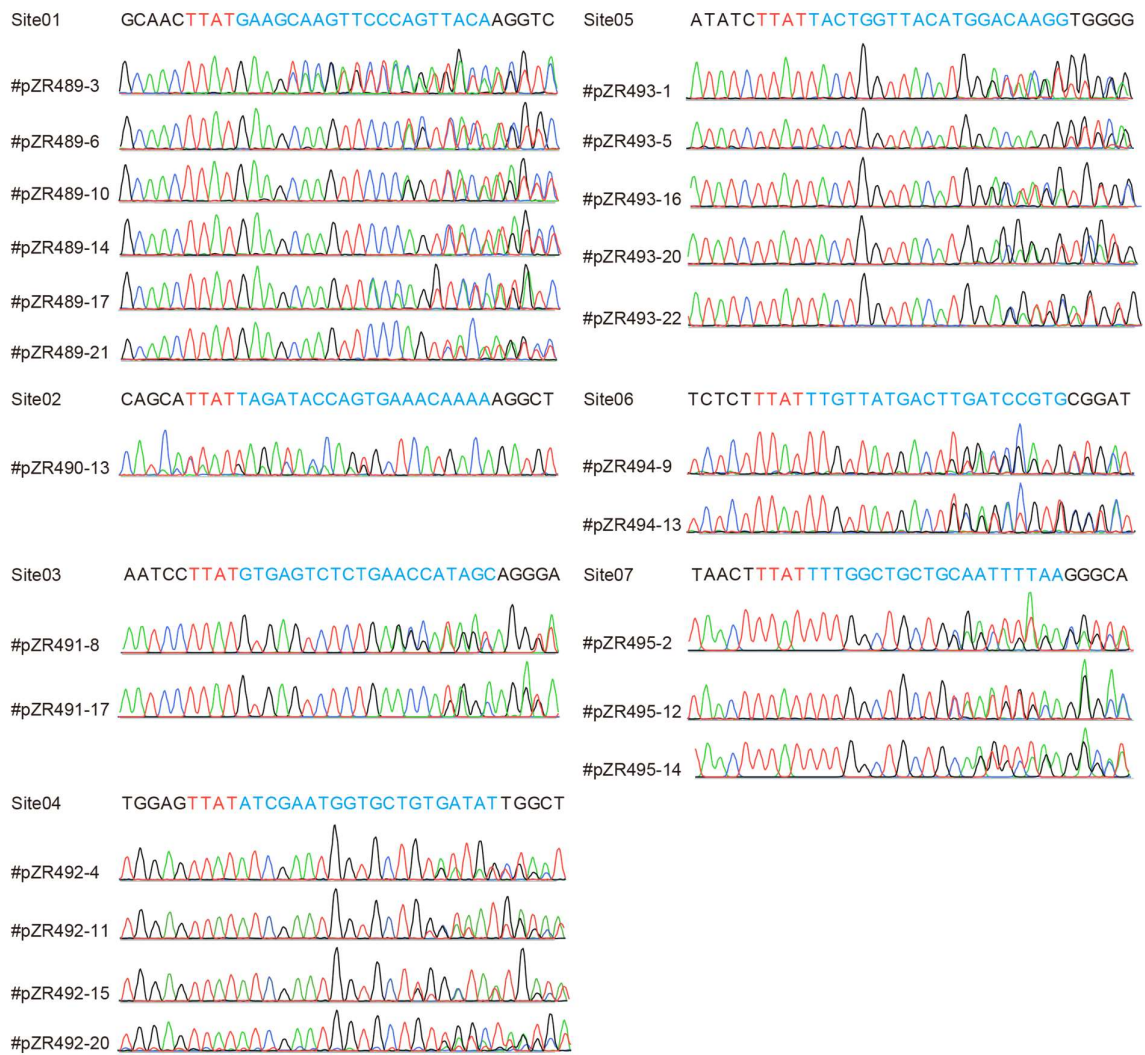

**Supplementary Figure 9. Sanger sequencing results of IsDge10 induced genome editing in rice T0 lines.** Sequences in blue indicate the guide RNA, and sequences in red indicate the TAM.

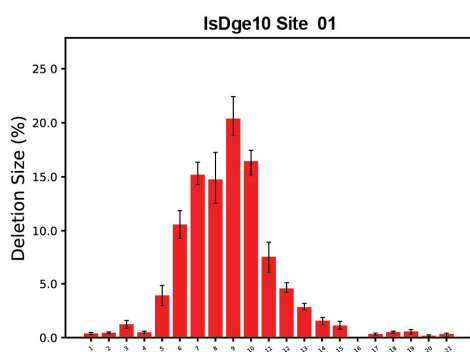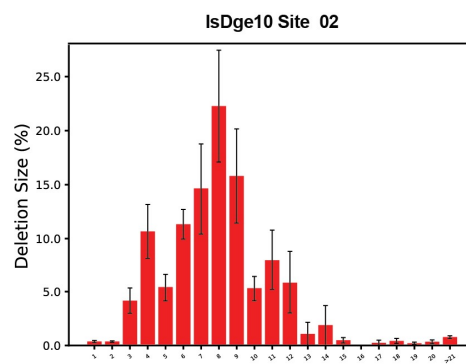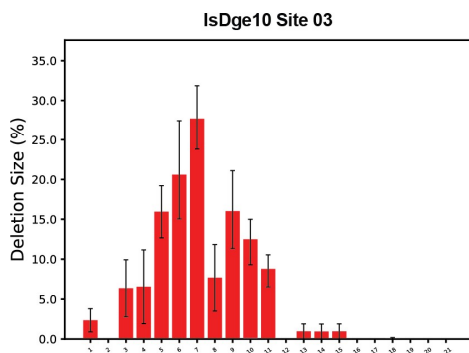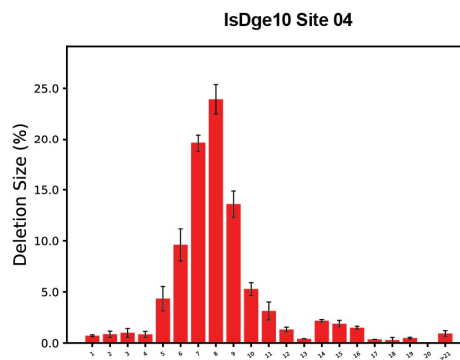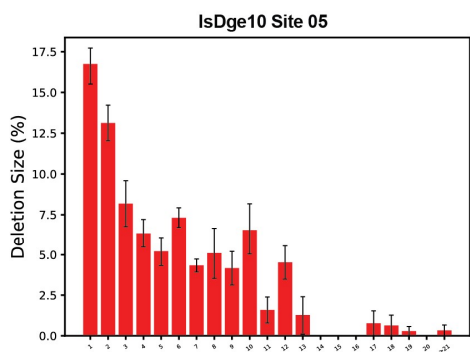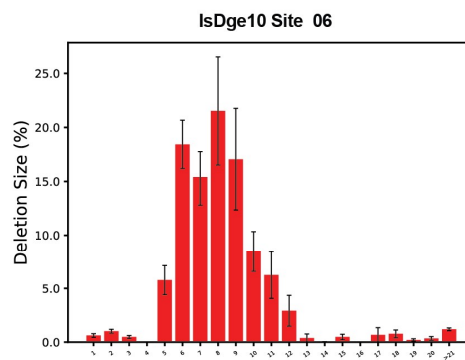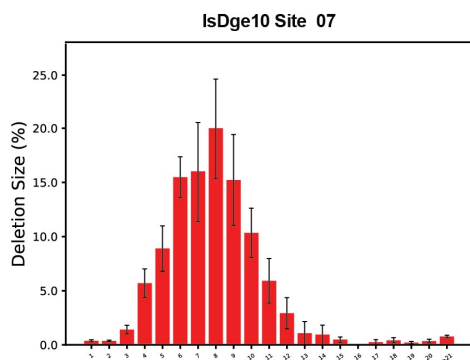

**Supplementary Figure 10. Deletion size profile of IsDge10 at 7 target sites in rice protoplasts using a multiple-editing strategy.** Each assay contains three independent experiments (n=3). Data are presented as mean values +/- SD.



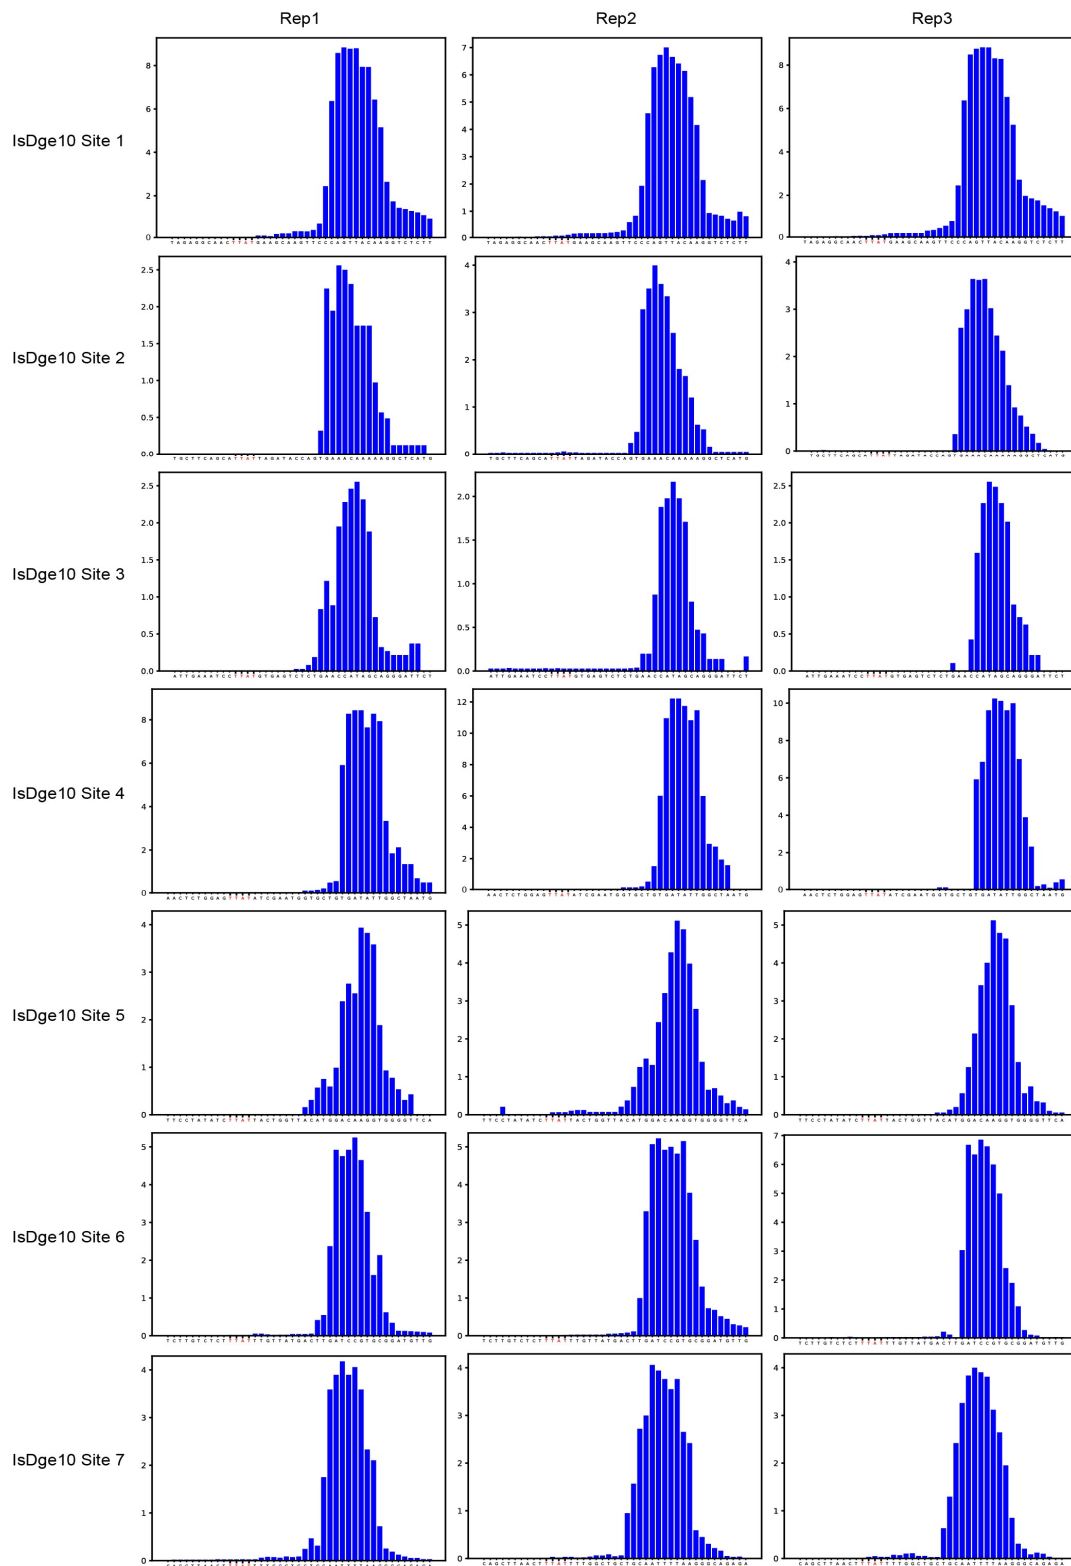

**Supplementary Figure 11. Deletion position profile of IsDge10 at 7 target sites in rice protoplasts using a multiple-editing strategy.** Editing at each site was biologically replicated three times, designated as Rep1, Rep2, and Rep3, respectively. Sequence in red indicated the TAM of IsDge10.



**Supplementary Table 1. Guide RNAs used in this study.**

| Targeted gene  | Targeted site        | Spacer sequence       |
|----------------|----------------------|-----------------------|
| <i>mCherry</i> | IsDge10-mCherry-gRNA | cctcctcgcccttgctcacc  |
| <i>mCherry</i> | IsAam1-mCherry-gRNA  | gtgggagcgcgatgaact    |
| <i>mCherry</i> | IsDra2-mCherry-gRNA  | gtgacgtttaggcgccgg    |
| <i>mCherry</i> | IsYmu1-mCherry-gRNA  | gtgacgtttaggcgccgg    |
| <i>mCherry</i> | enlscB-mCherry-gRNA  | ggtgccccctgcccttcgc   |
| <i>mCherry</i> | SpuFz1-mCherry-gRNA  | tggagggctccgtgaacggc  |
| LOC_Os01g01830 | IsDge10-Site1        | gaagcaagttcccagttaca  |
| LOC_Os03g02150 | IsDge10-Site2        | tagataccagtgaacaaaa   |
| LOC_Os05g01090 | IsDge10-Site3        | gtgagtctctgaacctatgc  |
| LOC_Os07g02300 | IsDge10-Site4        | atcgaatggtgctgtgatat  |
| LOC_Os09g04110 | IsDge10-Site5        | tactggttcatggacaagg   |
| LOC_Os11g01380 | IsDge10-Site6        | ttgtatgacttgatccgtg   |
| LOC_Os12g01520 | IsDge10-Site7        | tttgctgctgcaatttaa    |
| LOC_Os01g04200 | IsAam1-Site1         | tgaaggacaactctaggaa   |
| LOC_Os03g01920 | IsAam1-Site2         | tatctctcggtgaacacaa   |
| LOC_Os05g02880 | IsAam1-Site3         | ctgtgggattgatggtcact  |
| LOC_Os07g04160 | IsAam1-Site4         | atttaagattggtcaggac   |
| LOC_Os09g01680 | IsAam1-Site5         | aaattaataaggaccctctc  |
| LOC_Os11g03794 | IsAam1-Site6         | gcaaggaccattgctttctg  |
| LOC_Os12g03899 | IsAam1-Site7         | tattaggttagcacagcatg  |
| LOC_Os01g01830 | SpuFz1-Site1         | gcttatggcctaagtgaag   |
| LOC_Os03g01420 | SpuFz1-Site2         | gaggctgccaccgccaacgc  |
| LOC_Os05g01520 | SpuFz1-Site3         | tcaccagggaaacatcaattc |
| LOC_Os07g01890 | SpuFz1-Site4         | tatatgtgatagataatgga  |
| LOC_Os09g02130 | SpuFz1-Site5         | cgtagacagaaagggttactg |
| LOC_Os11g01872 | SpuFz1-Site6         | tggagaaactatactcaaaa  |
| LOC_Os12g02260 | SpuFz1-Site7         | attaataacctggtggaca   |
| LOC_Os06g02490 | enlscB-Site1         | GACAGATACAAATGGGATGC  |
| LOC_Os02g03700 | enlscB-Site2         | TTCGTGTCGGCGTTATCAAG  |
| LOC_Os07g12820 | enlscB-Site3         | TAGTGGCTGAATATATTCT   |
| LOC_Os03g11614 | enlscB-Site4         | TAATTTGGGACAAAGAACCA  |
| LOC_Os06g30310 | enlscB-Site5         | CTTGCAGGGTTCAGAAACCT  |
| LOC_Os02g18850 | enlscB-Site6         | GCCGGCGGTGGGGTGGGGTT  |
| LOC_Os04g52479 | enlscB-Site7         | ACAGCAGTGGGATTCCGCAT  |
| LOC_Os01g01830 | IsDge10-Site1-mm01   | ctagcaagttcccagttaca  |
| LOC_Os01g01830 | IsDge10-Site1-mm02   | gatccaagttcccagttaca  |
| LOC_Os01g01830 | IsDge10-Site1-mm03   | gaaggtagttcccagttaca  |
| LOC_Os01g01830 | IsDge10-Site1-mm04   | gaagcatctcccagttaca   |
| LOC_Os01g01830 | IsDge10-Site1-mm05   | gaagcaagaaccagttaca   |
| LOC_Os01g01830 | IsDge10-Site1-mm06   | gaagcaagttggcagttaca  |
| LOC_Os01g01830 | IsDge10-Site1-mm07   | gaagcaagttccgtgttaca  |
| LOC_Os01g01830 | IsDge10-Site1-mm08   | gaagcaagttcccacataca  |
| LOC_Os01g01830 | IsDge10-Site1-mm09   | gaagcaagttcccagtatca  |
| LOC_Os01g01830 | IsDge10-Site1-mm10   | gaagcaagttcccagtagt   |

**Supplementary Table 2. Oligos used in this study.**

| <b>Primer Name</b> | <b>Sequence (5'-3')</b>    | <b>Purpose</b>                         |
|--------------------|----------------------------|----------------------------------------|
| IsDeg10-01-HTS-F   | aagagatgtgctcgaatcagc      | <i>Primer for HTS at IsDge10-Site1</i> |
| IsDeg10-01-HTS-R   | tcttcattctctgggatcgca      |                                        |
| IsDeg10-02-HTS-F   | atggctggtactagcagaataag    | <i>Primer for HTS at IsDge10-Site2</i> |
| IsDeg10-02-HTS-R   | gtgtattcttgaggatctctgg     |                                        |
| IsDeg10-03-HTS-F   | tgcatgtttgtgacagaaaaga     | <i>Primer for HTS at IsDge10-Site3</i> |
| IsDeg10-03-HTS-R   | aaccttgcaatgcgattgat       |                                        |
| IsDeg10-04-HTS-F   | ttgcttttctatctggtcttgg     | <i>Primer for HTS at IsDge10-Site4</i> |
| IsDeg10-04-HTS-R   | catcaccatgtgataccaaagttg   |                                        |
| IsDeg10-05-HTS-F   | gcaagaggtagctgtccagc       | <i>Primer for HTS at IsDge10-Site5</i> |
| IsDeg10-05-HTS-R   | taccggtgggaatcgaggc        |                                        |
| IsDeg10-06-HTS-F   | gaaacaagcaagctcacctg       | <i>Primer for HTS at IsDge10-Site6</i> |
| IsDeg10-06-HTS-R   | ctgttcgtaaataatagtcctcaa   |                                        |
| IsDeg10-07-HTS-F   | gtagccttctcatctgtaactatctt | <i>Primer for HTS at IsDge10-Site7</i> |
| IsDeg10-07-HTS-R   | cctgaagatgcatgaccag        |                                        |
| IsAam1-01-HTS-F    | tgcaagttgttttgcctct        | <i>Primer for HTS at IsAam1-Site1</i>  |
| IsAam1-01-HTS-R    | gacataaattgaactaccacaaaca  |                                        |
| IsAam1-02-HTS-F    | aactacatagtgatagcctattgaca | <i>Primer for HTS at IsAam1-Site2</i>  |
| IsAam1-02-HTS-R    | ttgccatgtctatatggcac       |                                        |
| IsAam1-03-HTS-F    | gatcaactatcaatcaatacctgaga | <i>Primer for HTS at IsAam1-Site3</i>  |
| IsAam1-03-HTS-R    | tggtgactgatgctctttcaac     |                                        |
| IsAam1-04-HTS-F    | tcaataatattggaacgctttgca   | <i>Primer for HTS at IsAam1-Site4</i>  |
| IsAam1-04-HTS-R    | gagcatttgatacgaacaattgaa   |                                        |
| IsAam1-05-HTS-F    | atgctcatatgctagctctttt     | <i>Primer for HTS at IsAam1-Site5</i>  |
| IsAam1-05-HTS-R    | acttaacctgcaattatacagcg    |                                        |
| IsAam1-06-HTS-F    | caatgcgggcgaagtatgag       | <i>Primer for HTS at IsAam1-Site6</i>  |
| IsAam1-06-HTS-R    | cattgtctgatgaagtccaatgt    |                                        |
| IsAam1-07-HTS-F    | tctctgcaggctgccataaa       | <i>Primer for HTS at IsAam1-Site7</i>  |
| IsAam1-07-HTS-R    | aacatgaagctcttgcttgg       |                                        |
| enlscB-01-HTS-F    | AAATCATGACCTTTCAAGTTCCAA   | <i>Primer for HTS at enlscB-Site1</i>  |
| enlscB-01-HTS-R    | TGGGAGTTTGCAGATATGAC       |                                        |
| enlscB-02-HTS-F    | TTTCTGGGTTCGGTATCGGGA      | <i>Primer for HTS at enlscB-Site2</i>  |
| enlscB-02-HTS-R    | CCCCTGAAACCATACTCCTG       |                                        |
| enlscB-03-HTS-F    | CGAAATCTGACCATATCCTGCC     | <i>Primer for HTS at enlscB-Site3</i>  |
| enlscB-03-HTS-R    | CATTCATGAAGTAAGACAGGGTG    |                                        |
| enlscB-04-HTS-F    | CTATGAATATGAAATTAGCATC     | <i>Primer for HTS at enlscB-Site4</i>  |
| enlscB-04-HTS-R    | ATTTACTGTACGAGGTTAATGAAAG  |                                        |
| enlscB-05-HTS-F    | CAGTTCCAGACACTTCCAGC       | <i>Primer for HTS at enlscB-Site5</i>  |
| enlscB-05-HTS-R    | ATGATCCTGTAGGCCTTGGGA      |                                        |
| enlscB-06-HTS-F    | ATTACTGTTCTTGCTCGAGTTC     | <i>Primer for HTS at enlscB-Site6</i>  |
| enlscB-06-HTS-R    | CTCGCTGTCCATCTCCGAGA       |                                        |
| enlscB-07-HTS-F    | ATTGTTGCCAAGGCACCCTGG      | <i>Primer for HTS at enlscB-Site7</i>  |
| enlscB-07-HTS-R    | GGAGATTAAGTTTCCGCACC       |                                        |
| SpuFz1-01-HTS-F    | tgggacagttgctcttgcga       | <i>Primer for HTS at SpuFz1-Site1</i>  |

|                 |                         |                                       |
|-----------------|-------------------------|---------------------------------------|
| SpuFz1-01-HTS-R | cacctgcaccaataattgatgga |                                       |
| SpuFz1-02-HTS-F | gttccatgggccctcaaaga    | <i>Primer for HTS at SpuFz1-Site2</i> |
| SpuFz1-02-HTS-R | cacaccaggcgtatgttcct    |                                       |
| SpuFz1-03-HTS-F | gcatggcgcgatgtttcctt    |                                       |
| SpuFz1-03-HTS-R | tccagtcctctgaagaaaggt   | <i>Primer for HTS at SpuFz1-Site3</i> |
| SpuFz1-04-HTS-F | cgacatcataccaaagtgtgcc  |                                       |
| SpuFz1-04-HTS-R | acagctcttgatcccatca     | <i>Primer for HTS at SpuFz1-Site4</i> |
| SpuFz1-05-HTS-F | agggatggagggagaatagt    |                                       |
| SpuFz1-05-HTS-R | ccttcagcttgagcctacca    | <i>Primer for HTS at SpuFz1-Site5</i> |
| SpuFz1-06-HTS-F | gaccagcacttcgatagcct    |                                       |
| SpuFz1-06-HTS-R | cacaagttatctgacagaggcct | <i>Primer for HTS at SpuFz1-Site6</i> |
| SpuFz1-07-HTS-F | tatgtgccagttccacgagc    |                                       |
| SpuFz1-07-HTS-R | gctcaagggtccaccaaga     | <i>Primer for HTS at SpuFz1-Site7</i> |

---
